# Supplementary material for: Two-Year Prospective Single-Arm Multicenter Study Results of Clinical Safety and Performance of Synthetic Parietene TM DS Composite Mesh in Ventral Hernia Repair
Source: Research Square preprint supplement (doi:10.21203/rs.3.rs-6968878/v1), 2025-08-25
Supplement: Supplementary file 1 [file 31b577bbe779b55c6b00a7b6.pdf]

**Surgeon Satisfaction Questionnaire**

1. How easy was the mesh introduction to working cavity?

☐ Very difficult      ☐ Difficult      ☐ Easy      ☐ Very Easy

2. How would you describe mesh deployment?

☐ Very difficult      ☐ Difficult      ☐ Easy      ☐ Very Easy

3. Rate your experience handling this mesh?

☐ Very difficult      ☐ Difficult      ☐ Easy      ☐ Very Easy

4. How would you describe the mesh transparency?

☐ Not transparent      ☐ Transparent      ☐ Very transparent

5. How did you utilize the violet markings?

|                                                                                   | YES                      | NO                       |
|-----------------------------------------------------------------------------------|--------------------------|--------------------------|
| Did you use the violet markings to help center and orient the mesh?               | <input type="checkbox"/> | <input type="checkbox"/> |
| Did you use the marking dots for overlap management (2.5 cm in between each dot)? | <input type="checkbox"/> | <input type="checkbox"/> |
| Did you use the transfascial sutures to help position the mesh?                   | <input type="checkbox"/> | <input type="checkbox"/> |
