# Supplementary material for: Two-Year Prospective Single-Arm Multicenter Study Results of Clinical Safety and Performance of Synthetic Parietene TM DS Composite Mesh in Ventral Hernia Repair
Source: Research Square preprint supplement (doi:10.21203/rs.3.rs-6968878/v1), 2025-08-25
Supplement: Supplementary file 1 [file 59cd625cbe6ce4585d408022.docx]

**Table 1. Patient disposition, demographics, and baseline characteristics.**

|  | | **Hernia Type** | | | **Surgical Approach** | | | |
| --- | --- | --- | --- | --- | --- | --- | --- | --- |
|  | **Overall (N=125)** | **Primary**  **(N=70)** | **Incisional**  **(N=55)** | **P-values** Primary vs incisional | **Robotic**  **(N=56)** | **Laparoscopic**  **(N=68)** | **Open**  **(N=1)** | **P-values** Robotic vs Laparoscopic |
| Age, yrs | 58.0 ± 12.31 | 54.7 ± 11.80 | 62.2 ± 11.73 | <0.001 | 57.9 ± 10.58 | 58.4 ± 13.57 | 41.0 ± . | 0.855 |
| Male | 74 (59.2%) | 56 (80.0%) | 18 (32.7%) | <0.001 | 33 (58.9%) | 41 (60.3%) | 0 (0.0%) | 0.877 |
| BMI, kg/m² | 33.2 ± 4.82 | 32.7 ± 4.62 | 33.7 ± 5.06 | 0.256 | 33.1 ± 4.62 | 33.3 ± 5.05 | 32.0 ± . | 0.809 |
| Medical History |  |  |  |  |  |  |  |  |
| Obesity | 81 (64.8%) | 42 (60.0%) | 39 (70.9%) | 0.205 | 35 (62.5%) | 45 (66.2%) | 1 (100.0%) | 0.670 |
| Hypertension | 62 (49.6%) | 31 (44.3%) | 31 (56.4%) | 0.180 | 29 (51.8%) | 32 (47.1%) | 1 (100.0%) | 0.600 |
| Hyperlipidemia | 24 (19.2%) | 13 (18.6%) | 11 (20.0%) | 0.840 | 6 (10.7%) | 18 (26.5%) | 0 (0.0%) | 0.027 |
| Gastroesophageal reflux disease | 19 (15.2%) | 9 (12.9%) | 10 (18.2%) | 0.410 | 11 (19.6%) | 8 (11.8%) | 0 (0.0%) | 0.226 |
| Diabetes mellitus | 16 (12.8%) | 7 (10.0%) | 9 (16.4%) | 0.290 | 9 (16.1%) | 7 (10.3%) | 0 (0.0%) | 0.340 |
| Hypothyroidism | 16 (12.8%) | 6 (8.6%) | 10 (18.2%) | 0.110 | 5 (8.9%) | 11 (16.2%) | 0 (0.0%) | 0.231 |
| Obstructive sleep apnea | 14 (11.2%) | 5 (7.1%) | 9 (16.4%) | 0.105 | 6 (10.7%) | 8 (11.8%) | 0 (0.0%) | 0.854 |
| Sleep apnea | 12 (9.6%) | 6 (8.6%) | 6 (10.9%) | 0.660 | 6 (10.7%) | 6 (8.8%) | 0 (0.0%) | 0.723 |
| Postmenauposal | 11 (8.8%) | 3 (4.3%) | 8 (14.5%) | 0.058 | 6 (10.7%) | 5 (7.4%) | 0 (0.0%) | 0.542 |
| Heart disease | 10 (8.0%) | 4 (5.7%) | 6 (10.9%) | 0.333 | 5 (8.9%) | 5 (7.4%) | 0 (0.0%) | 0.754 |
| Other | 91 (72.8%) | 46 (65.7%) | 45 (81.8%) | 0.045 | 37 (66.1%) | 53 (77.9%) | 1 (100.0%) | 0.140 |
| Repair for recurrent hernia | 15 (12.0%) | 0 (0.0%) | 15 (27.3%) | <0.001 | 12 (21.4%) | 2 (2.9%) | 1 (100.0%) | 0.001 |
| Surgical History | 98 (78.4%) | 43 (61.4%) | 55 (100.0%) | <0.001 | 40 (71.4%) | 57 (83.8%) | 1 (100.0%) | 0.096 |
| Previous hernia surgery | 36 (28.8%) | 9 (12.9%) | 27 (49.1%) | <0.001 | 20 (35.7%) | 15 (22.1%) | 1 (100.0%) | 0.093 |
