# Supplementary material for: Two-Year Prospective Single-Arm Multicenter Study Results of Clinical Safety and Performance of Synthetic Parietene TM DS Composite Mesh in Ventral Hernia Repair
Source: Research Square preprint supplement (doi:10.21203/rs.3.rs-6968878/v1), 2025-08-25
Supplement: Supplementary file 2 [file cbf14224c61a4e3a12a65211.docx]

**Table 3. ADEs occurrences features.**

|  | | | **Hernia Type** | | | | **Surgical Approach** | | | |
| --- | --- | --- | --- | --- | --- | --- | --- | --- | --- | --- |
| **ADEs events**** | | **Overall** | **Primary** | **Incisional** | **P-values*** Primary vs Incisional | | **Robotic** | **Laparoscopic** | **Open** | **P-values*** Robotic vs Laparoscopic |
| **(N=60)** | **(N=26)** | **(N=34)** | **(N=17)** | **(N=43 ADEs)** | **(N=0)** |
| Intra-operative ADE | n (%) | 0 (0.0%) | 0 (0.0%) | 0 (0.0%) | NA | | 0 (0.0%) | 0 (0.0%) | NA | NA |
| Peri-operative ADE | n (%) | 14 (23.3%) | 5 (19.2%) | 9 (26.5%) | 0.511 | | 6 (35.3%) | 8 (18.6%) | 0.190 |
| ADE within 1-Month | n (%) | 41 (68.8%) | 19 (73.1%) | 22 (64.7%) | 0.490 | | 10 (58.8%) | 31 (72.1%) | 0.319 |
| ADE within 3-Month | n (%) | 44 (73.3%) | 20 (76.9%) | 24 (70.6%) | 0.582 | | 10 (58.8%) | 34 (79.1%) | 0.193 |
| ADE within 12-Month | n (%) | 55 (91.7%) | 24 (92.3%) | 31 (91.2%) | 1 | | 16 (94.1%) | 39 (90.7%) | 1 |
| ADE within 24-Month | n (%) | 60 (100.0%) | 26 (100.0%) | 34 (100.0%) | 1 | | 17 (100.0%) | 43 (100.0%) | 1 |
|  | | | **Hernia Type** | | | | **Surgical Approach** | | | |
| **Subjects with ADEs**** | | **Overall** | **Primary** | **Incisional** | | **P-values*** Primary vs Incisional | **Robotic** | **Laparoscopic** | **Open** | **P-values*** Robotic vs Laparoscopic |
| **(N=125)** | **(N=70)** | **(N=55)** | | **(N=56)** | **(N=68)** | **(N=1)** |
| Subjects with intra-operative ADE | n (%) | 0 (0.0%) | 0 (0.0%) | 0 (0.0%) | | NA | 0 (0.0%) | 0 (0.0%) | 0 (0.0%) | NA |
| Subjects with peri-operative ADE (from surgery through discharge) | n (%) | 14 (11.2%) | 5 (7.1%) | 9 (16.4%) | | 0.105 | 6 (10.7%) | 8 (11.8%) | 0 (0.0%) | 0.854 |
| Subjects with at least 1 ADE occurring within 1-Month | n (%) | 31 (24.8%) | 15 (21.4%) | 16 (29.1%) | | 0.325 | 9 (16.1%) | 22 (32.4%) | 0 (0.0%) | 0.037 |
| Subjects with at least 1 ADE occurring within 3-Month | n (%) | 34 (27.2%) | 16 (22.9%) | 18 (32.7%) | | 0.218 | 9 (16.1%) | 25 (36.8%) | 0 (0.0%) | 0.010 |
| Subjects with at least 1 ADE occurring within 12-Month | n (%) | 40 (32.0%) | 19 (27.1%) | 21 (38.2%) | | 0.189 | 14 (25.0%) | 26 (38.2%) | 0 (0.0%) | 0.117 |
| Subjects with at least 1 ADE occurring within 24-Month | n (%) | 42 (33.6%) | 19 (27.1%) | 23 (41.8%) | | 0.085 | 14 (25.0%) | 28 (41.2%) | 0 (0.0%) | 0.058 |
| * P-values for comparison between hernia groups or surgical approach are from Chi-Square or Fisher Exact Tests.  ** ADEs events occurring at a specific timepoint are also reported in the following one. | | | | | | | | | | |
