# Supplementary material for: Two-Year Prospective Single-Arm Multicenter Study Results of Clinical Safety and Performance of Synthetic Parietene TM DS Composite Mesh in Ventral Hernia Repair
Source: Research Square preprint supplement (doi:10.21203/rs.3.rs-6968878/v1), 2025-08-25
Supplement: Supplementary file 3 [file cc2660760a22def7a66151b9.docx]

**Table 2. Hernia recurrence rate in the study population (n=125) during the follow-up period.**

| **Hernia recurrence rate at follow-up** | **Overall Subjects (N=125)** | **Primary Hernia (N=70)** | **Incisional Hernia (N=55)** | **Robotically assisted Laparoscopic repair (N=56)** | **Traditional**  **Laparoscopic repair (N=68)** |
| --- | --- | --- | --- | --- | --- |
| Visits within 1 month* | 0 (0.0%) | 0 (0.0%) | 0 (0.0%) | 0 (0.0%) | 0 (0.0%) |
| (0.0%-2.9%) | (0.0%-5.2%) | (0.0%-6.5%) | (0.0%-6.5%) | (0.0%-5.3%) |
| Visits within 3 months* | 0 (0.0%) | 0 (0.0%) | 0 (0.0%) | 0 (0.0%) | 0 (0.0%) |
| (0.0%-3.0%) | (0.0%-5.2%) | (0.0%-6.5%) | (0.0%-6.6%) | (0.0%-5.3%) |
| Visits within 12 months* | 4 (3.3%) | 2 (3.1%) | 2 (3.6%) | 2 (3.7%) | 2 (3.1%) |
| (1.0%-8.5%) | (0.2%-11.2%) | (0.3%-13.0%) | (0.3%-13.3%) | (0.2%-11.2%) |
| Visits within 24 months | 4 (3.8%) | 2 (3.3%) | 2 (4.3%) | 2 (4.1%) | 2 (3.6%) |
| (1.2%-9.6%) | (0.3%-12.0%) | (0.4%-15.3%) | (0.4%-14.5%) | (0.3%-12.8%) |

*Hernia recurrences are assessed within 1, 3 or 12 months. When a recurrence occurs at a specific timepoint, it is also reported in the following one.

Of the total 125 subjects included in the study, 120 were considered for the primary endpoint analysis (12-months follow-up), 124 subjects were included in the 1-month analysis, 123 subjects were included in the 3-months and 106 in the 24-months analysis.
