# Supplementary material for: Two-Year Prospective Single-Arm Multicenter Study Results of Clinical Safety and Performance of Synthetic Parietene TM DS Composite Mesh in Ventral Hernia Repair
Source: Research Square preprint supplement (doi:10.21203/rs.3.rs-6968878/v1), 2025-08-25
Supplement: Supplementary file 4 [file d68974116f5151ba1a33e812.docx]

**Supplementary Data**

**Table 1. List of ADEs (Adverse Device Effects) occurred within the study.**

|  | | **Overall** | | **Primary**  **Hernia** | | **Incisional**  **Hernia** | | **Robotically assisted**  **Laparoscopic repair** | | **Laparoscopic**  **repair** | |
| --- | --- | --- | --- | --- | --- | --- | --- | --- | --- | --- | --- |
| **ADEs** [1] | | **Subjects** (N=125) | **Events** (N=60) | **Subjects** (N=70) | **Events** (N=26) | **Subjects** (N=55) | **Events** (N=34) | **Subjects** (N=56) | **Events** (N=17) | **Subjects** (N=68) | **Events** (N=43) |
| Subjects with at least 1 ADE | n (%) | 42 (33.6%) | 60 | 19 (27.1%) | 26 | 23 (41.8%) | 34 | 14 (25.0%) | 17 | 28 (41.2%) | 43 |
| Seroma | n (%) | 12 (9.6%) | 12 | 7 (10.0%) | 7 | 5 (9.1%) | 5 | 3 (5.4%) | 3 | 9 (13.2%) | 9 |
| Bowel Obstruction | n (%) | 6 (4.8%) | 6 | 2 (2.9%) | 2 | 4 (7.3%) | 4 | 3 (5.4%) | 3 | 3 (4.4%) | 3 |
| Chronic Pain | n (%) | 6 (4.8%) | 6 | 2 (2.9%) | 2 | 4 (7.3%) | 4 | 1 (1.8%) | 1 | 5 (7.4%) | 5 |
| Hernia recurrence | n (%) | 4 (3.2%) | 4 | 2 (2.9%) | 2 | 2 (3.6%) | 2 | 2 (3.6%) | 2 | 2 (2.9%) | 2 |
| Surgical Site Infection | n (%) | 3 (2.4%) | 4 | 2 (2.9%) | 2 | 1 (1.8%) | 2 | 1 (1.8%) | 2 | 2 (2.9%) | 2 |
| Acute Pain | n (%) | 3 (2.4%) | 3 | 2 (2.9%) | 2 | 1 (1.8%) | 1 | 0 (0.0%) | 0 | 3 (4.4%) | 3 |
| Hypoxia | n (%) | 3 (2.4%) | 3 | 3 (4.3%) | 3 | 0 (0.0%) | 0 | 0 (0.0%) | 0 | 3 (4.4%) | 3 |
| New hernia | n (%) | 3 (2.4%) | 3 | 2 (2.9%) | 2 | 1 (1.8%) | 1 | 0 (0.0%) | 0 | 3 (4.4%) | 3 |
| Constipation | n (%) | 2 (1.6%) | 2 | 1 (1.4%) | 1 | 1 (1.8%) | 1 | 1 (1.8%) | 1 | 1 (1.5%) | 1 |
| Erythema/Rash | n (%) | 2 (1.6%) | 2 | 0 (0.0%) | 0 | 2 (3.6%) | 2 | 0 (0.0%) | 0 | 2 (2.9%) | 2 |
| Urinary retention | n (%) | 2 (1.6%) | 2 | 0 (0.0%) | 0 | 2 (3.6%) | 2 | 2 (3.6%) | 2 | 0 (0.0%) | 0 |
| Allergic reaction to bandage | n (%) | 1 (0.8%) | 1 | 1 (1.4%) | 1 | 0 (0.0%) | 0 | 0 (0.0%) | 0 | 1 (1.5%) | 1 |
| Blood count anomaly | n (%) | 1 (0.8%) | 1 | 0 (0.0%) | 0 | 1 (1.8%) | 1 | 1 (1.8%) | 1 | 0 (0.0%) | 0 |
| Breast necrosis | n (%) | 1 (0.8%) | 1 | 0 (0.0%) | 0 | 1 (1.8%) | 1 | 1 (1.8%) | 1 | 0 (0.0%) | 0 |
| Burning sensation | n (%) | 1 (0.8%) | 1 | 1 (1.4%) | 1 | 0 (0.0%) | 0 | 0 (0.0%) | 0 | 1 (1.5%) | 1 |
| Diastasis recti abdominis | n (%) | 1 (0.8%) | 1 | 0 (0.0%) | 0 | 1 (1.8%) | 1 | 0 (0.0%) | 0 | 1 (1.5%) | 1 |
| Hematoma | n (%) | 1 (0.8%) | 1 | 0 (0.0%) | 0 | 1 (1.8%) | 1 | 0 (0.0%) | 0 | 1 (1.5%) | 1 |
| Hypoaesthesia | n (%) | 1 (0.8%) | 1 | 0 (0.0%) | 0 | 1 (1.8%) | 1 | 0 (0.0%) | 0 | 1 (1.5%) | 1 |
| Nausea | n (%) | 1 (0.8%) | 1 | 0 (0.0%) | 0 | 1 (1.8%) | 1 | 0 (0.0%) | 0 | 1 (1.5%) | 1 |
| Pacemaker generated rhythm | n (%) | 1 (0.8%) | 1 | 0 (0.0%) | 0 | 1 (1.8%) | 1 | 0 (0.0%) | 0 | 1 (1.5%) | 1 |
| Rotator cuff syndrome | n (%) | 1 (0.8%) | 1 | 0 (0.0%) | 0 | 1 (1.8%) | 1 | 0 (0.0%) | 0 | 1 (1.5%) | 1 |
| Superficial vein thrombosis | n (%) | 1 (0.8%) | 1 | 0 (0.0%) | 0 | 1 (1.8%) | 1 | 0 (0.0%) | 0 | 1 (1.5%) | 1 |
| Suture granuloma | n (%) | 1 (0.8%) | 1 | 0 (0.0%) | 0 | 1 (1.8%) | 1 | 0 (0.0%) | 0 | 1 (1.5%) | 1 |
| Wound dehiscence | n (%) | 1 (0.8%) | 1 | 1 (1.4%) | 1 | 0 (0.0%) | 0 | 1 (1.8%) | 1 | 0 (0.0%) | 0 |

[1] Each Subject is only counted once per ADE category.
