# Supplementary material for: Two-Year Prospective Single-Arm Multicenter Study Results of Clinical Safety and Performance of Synthetic Parietene TM DS Composite Mesh in Ventral Hernia Repair
Source: Research Square preprint supplement (doi:10.21203/rs.3.rs-6968878/v1), 2025-08-25
Supplement: Supplementary file 5 [file ece9991c2fc42839a7b9ed16.docx]

**Supplementary data**

**Table 2. Relationship assessment of ADEs (Adverse Device Effects) with procedures and/or device.**

|  | | | **Hernia Type** | | | **Surgical Approach** | | | |
| --- | --- | --- | --- | --- | --- | --- | --- | --- | --- |
|  | | **Overall** | **Primary** | **Incisional** | **P-values*** Primary vs Incisional | **Robotic** | **Laparoscopic** | **Open** | **P-values*** Robotic vs laparoscopic |
| **(N=125)** | **(N=70)** | **(N=55)** | **(N=56)** | **(N=68)** | **(N=1)** |
| Subjects with intra-operative ADE | n (%) | 0 (0.0%) | 0 (0.0%) | 0 (0.0%) | NA | 0 (0.0%) | 0 (0.0%) | 0 (0.0%) | NA |
| Procedure-related Only | n (%) | 0 (0.0%) | 0 (0.0%) | 0 (0.0%) | NA | 0 (0.0%) | 0 (0.0%) | 0 (0.0%) | NA |
| Both Related to Procedure and Device | n (%) | 0 (0.0%) | 0 (0.0%) | 0 (0.0%) | NA | 0 (0.0%) | 0 (0.0%) | 0 (0.0%) | NA |
| Device-Related only | n (%) | 0 (0.0%) | 0 (0.0%) | 0 (0.0%) | NA | 0 (0.0%) | 0 (0.0%) | 0 (0.0%) | NA |
| Subjects with peri-operative ADE (from surgery through discharge) | n (%) | 14 (11.2%) | 5 (7.1%) | 9 (16.4%) | 0.105 | 6 (10.7%) | 8 (11.8%) | 0 (0.0%) | 0.854 |
| Procedure-Related Only | n (%) | 14 (11.2%) | 5 (7.1%) | 9 (16.4%) | 0.105 | 6 (10.7%) | 8 (11.8%) | 0 (0.0%) | 0.854 |
| Both Related to Procedure and Device | n (%) | 0 (0.0%) | 0 (0.0%) | 0 (0.0%) | NA | 0 (0.0%) | 0 (0.0%) | 0 (0.0%) | NA |
| Device-Related only | n (%) | 0 (0.0%) | 0 (0.0%) | 0 (0.0%) | NA | 0 (0.0%) | 0 (0.0%) | 0 (0.0%) | NA |
| Subjects with at least 1 ADE occurring within 1-Month | n (%) | 31 (24.8%) | 15 (21.4%) | 16 (29.1%) | 0.325 | 9 (16.1%) | 22 (32.4%) | 0 (0.0%) | 0.037 |
| Procedure-Related Only | n (%) | 21 (16.8%) | 11 (15.7%) | 10 (18.2%) | 0.715 | 7 (12.5%) | 14 (20.6%) | 0 (0.0%) | 0.232 |
| Both related to Procedure and Device | n (%) | 12 (9.6%) | 4 (5.7%) | 8 (14.5%) | 0.096 | 2 (3.6%) | 10 (14.7%) | 0 (0.0%) | 0.037 |
| Device-related Only | n (%) | 0 (0.0%) | 0 (0.0%) | 0 (0.0%) | NA | 0 (0.0%) | 0 (0.0%) | 0 (0.0%) | NA |
| Subjects with at least 1 ADE occurring within 3-Month | n (%) | 34 (27.2%) | 16 (22.9%) | 18 (32.7%) | 0.218 | 9 (16.1%) | 25 (36.8%) | 0 (0.0%) | 0.010 |
| Procedure-Related Only | n (%) | 23 (18.4%) | 11 (15.7%) | 12 (21.8%) | 0.382 | 7 (12.5%) | 16 (23.5%) | 0 (0.0%) | 0.116 |
| Both related to Procedure and Device | n (%) | 13 (10.4%) | 5 (7.1%) | 8 (14.5%) | 0.178 | 2 (3.6%) | 11 (16.2%) | 0 (0.0%) | 0.023 |
| Device-Related Only | n (%) | 0 (0.0%) | 0 (0.0%) | 0 (0.0%) | NA | 0 (0.0%) | 0 (0.0%) | 0 (0.0%) | NA |
| Subjects with at least 1 ADE occurring within 12-Month | n (%) | 40 (32.0%) | 19 (27.1%) | 21 (38.2%) | 0.189 | 14 (25.0%) | 26 (38.2%) | 0 (0.0%) | 0.117 |
| Procedure-Related Only | n (%) | 23 (18.4%) | 11 (15.7%) | 12 (21.8%) | 0.382 | 7 (12.5%) | 16 (23.5%) | 0 (0.0%) | 0.116 |
| Both Related to Procedure and Device | n (%) | 21 (16.8%) | 9 (12.9%) | 12 (21.8%) | 0.183 | 7 (12.5%) | 14 (20.6%) | 0 (0.0%) | 0.232 |
| Device-Related Only | n (%) | 0 (0.0%) | 0 (0.0%) | 0 (0.0%) | NA | 0 (0.0%) | 0 (0.0%) | 0 (0.0%) | NA |
| Subjects with at least 1 ADE occurring within 24-Month | n (%) | 42 (33.6%) | 19 (27.1%) | 23 (41.8%) | 0.085 | 14 (25.0%) | 28 (41.2%) | 0 (0.0%) | 0.058 |
| Procedure-related Only | n (%) | 24 (19.2%) | 11 (15.7%) | 13 (23.6%) | 0.264 | 7 (12.5%) | 17 (25.0%) | 0 (0.0%) | 0.080 |
| Both Related to Procedure and Device | n (%) | 22 (17.6%) | 9 (12.9%) | 13 (23.6%) | 0.116 | 7 (12.5%) | 15 (22.1%) | 0 (0.0%) | 0.166 |
| Device-Related Only | n (%) | 0 (0.0%) | 0 (0.0%) | 0 (0.0%) | NA | 0 (0.0%) | 0 (0.0%) | 0 (0.0%) | NA |
| * P-values for comparison between hernia groups or surgical approach are from Chi-Square or Fisher Exact Tests. | | | | | | | | | | |
